# Supplementary material for: Bone Marrow Mesenchymal Stem Cells Enhance the Differentiation of Human Switched Memory B Lymphocytes into Plasma Cells in Serum-Free Medium
Source: Hindawi journal article supplement (doi:10.1155/2016/7801781), 2016-01-01

Supplemental 1

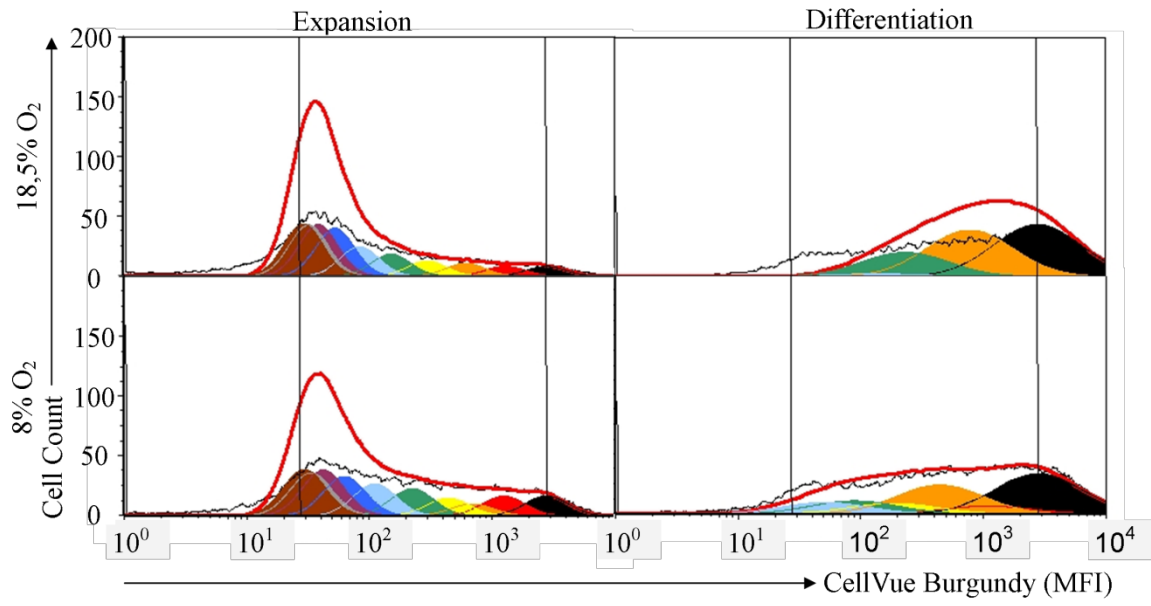

Supplemental 2

A

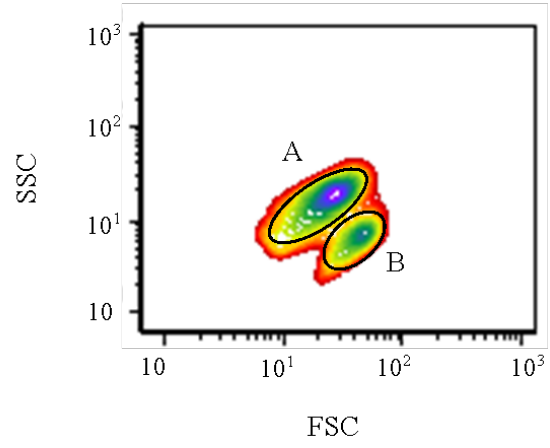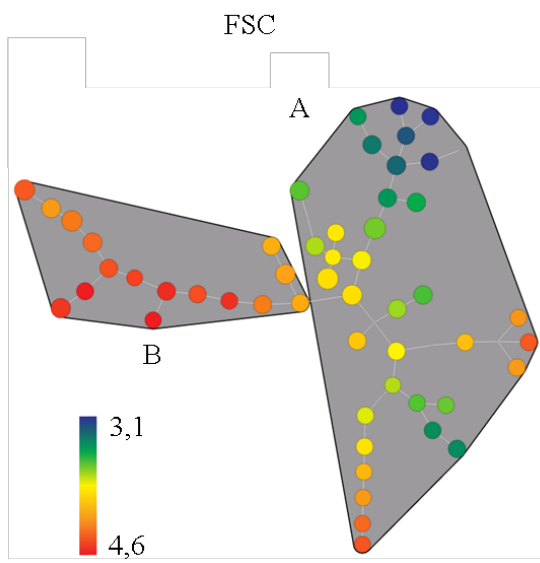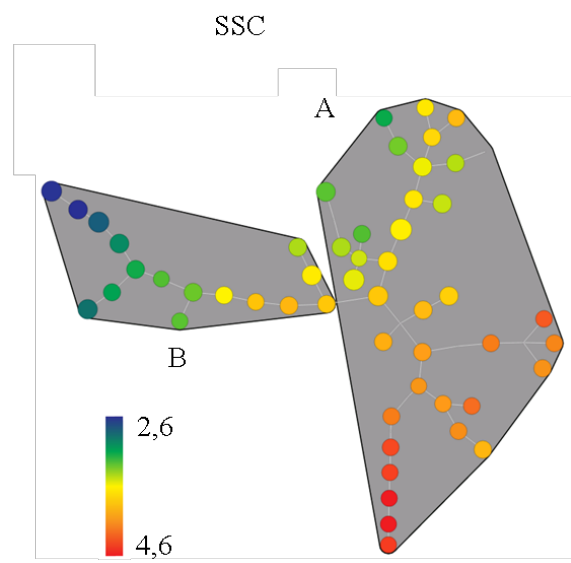

B

CD31

21% MSC

21% L4.5

8% MSC

8% L4.5

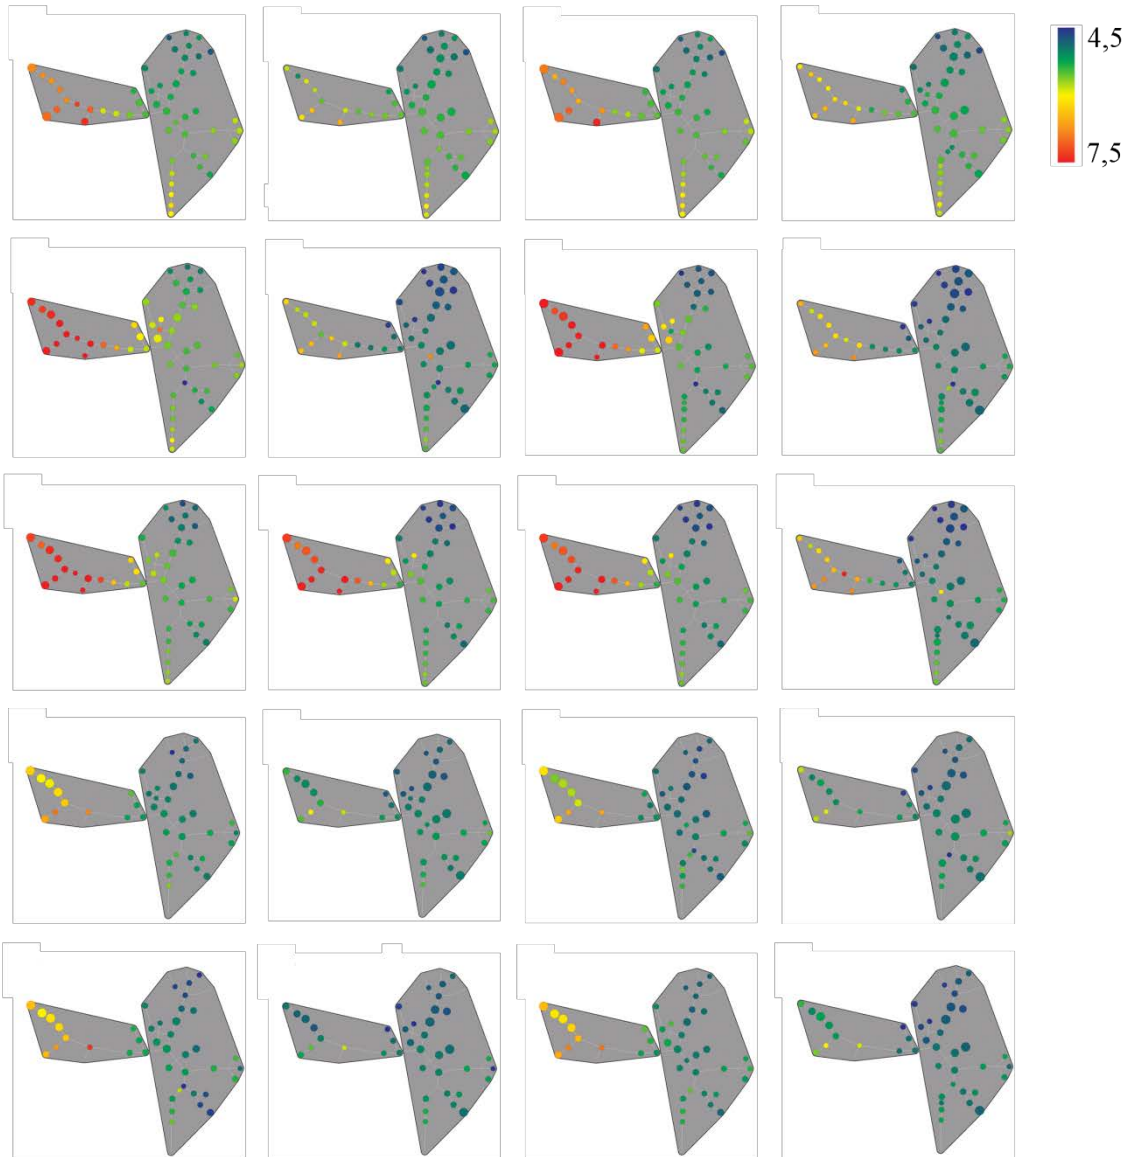

C

CD38

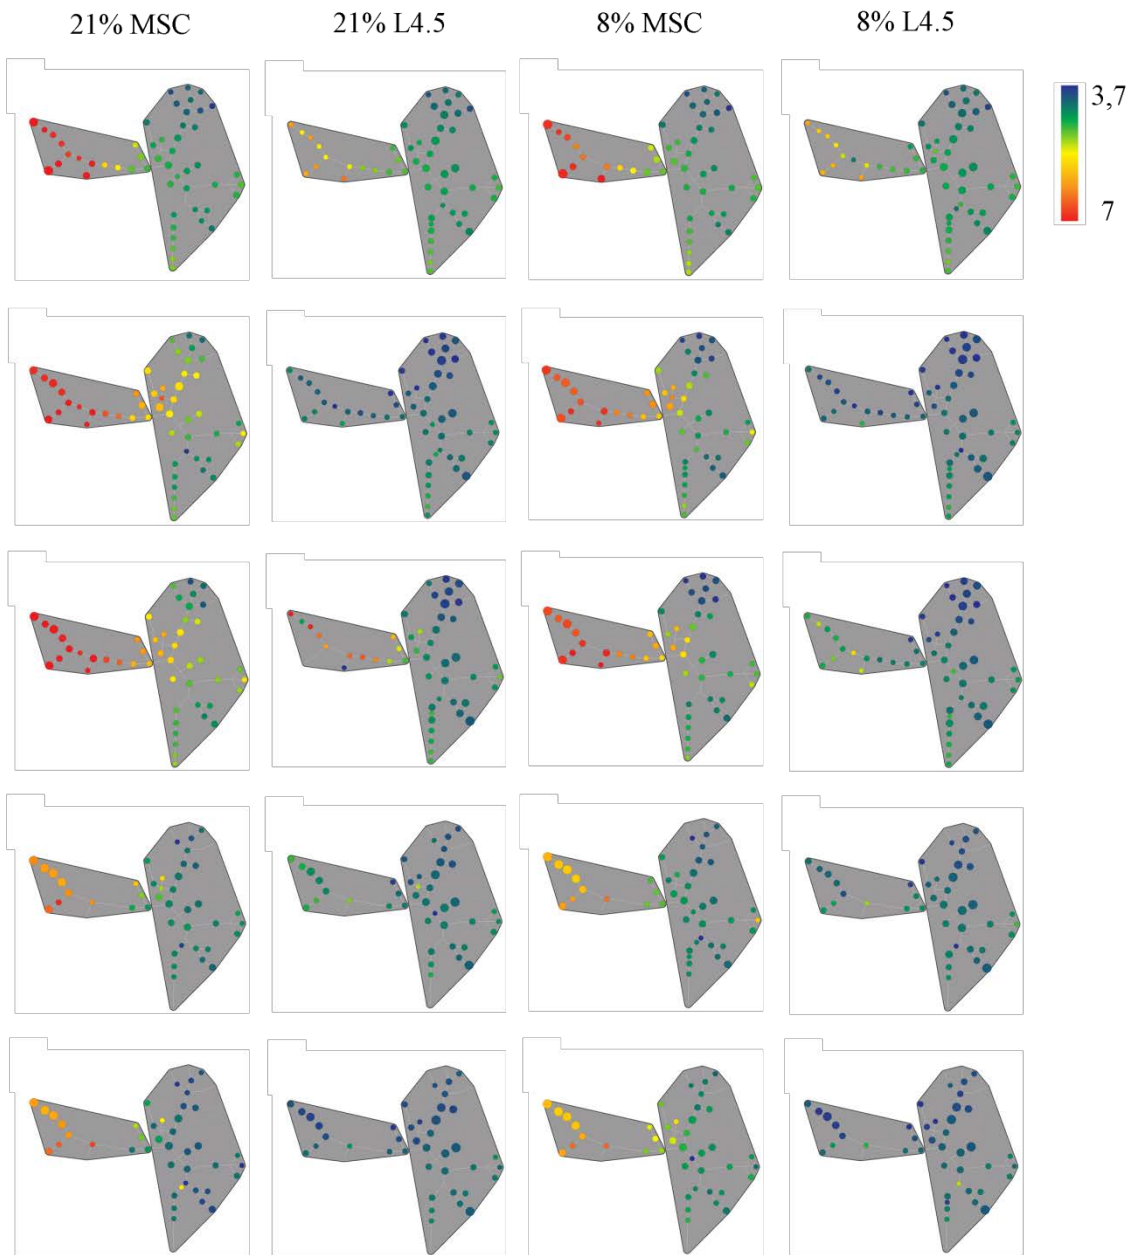

D

CD39

21% MSC

21% L4.5

8% MSC

8% L4.5

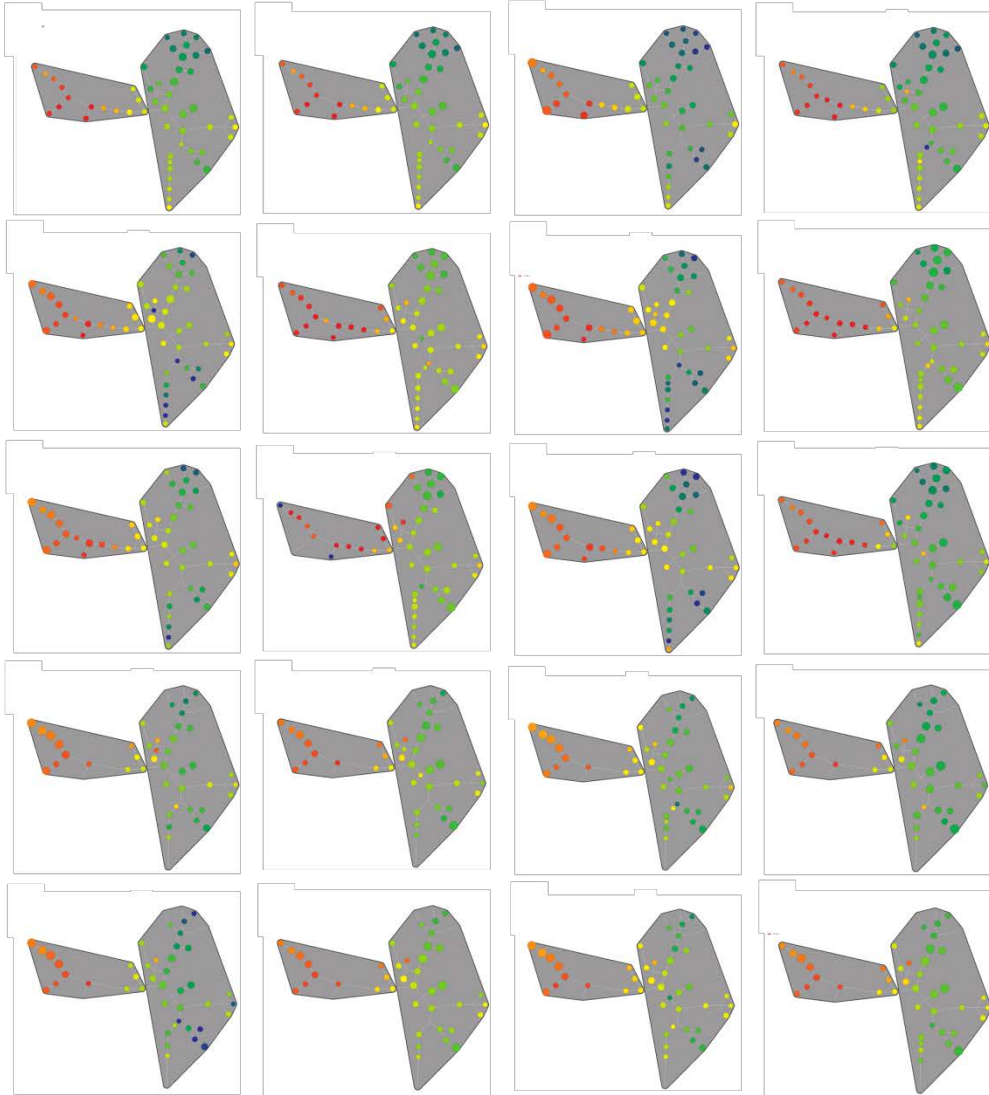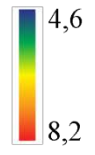

E

CD138

21% MSC

21% L4.5

8% MSC

8% L4.5

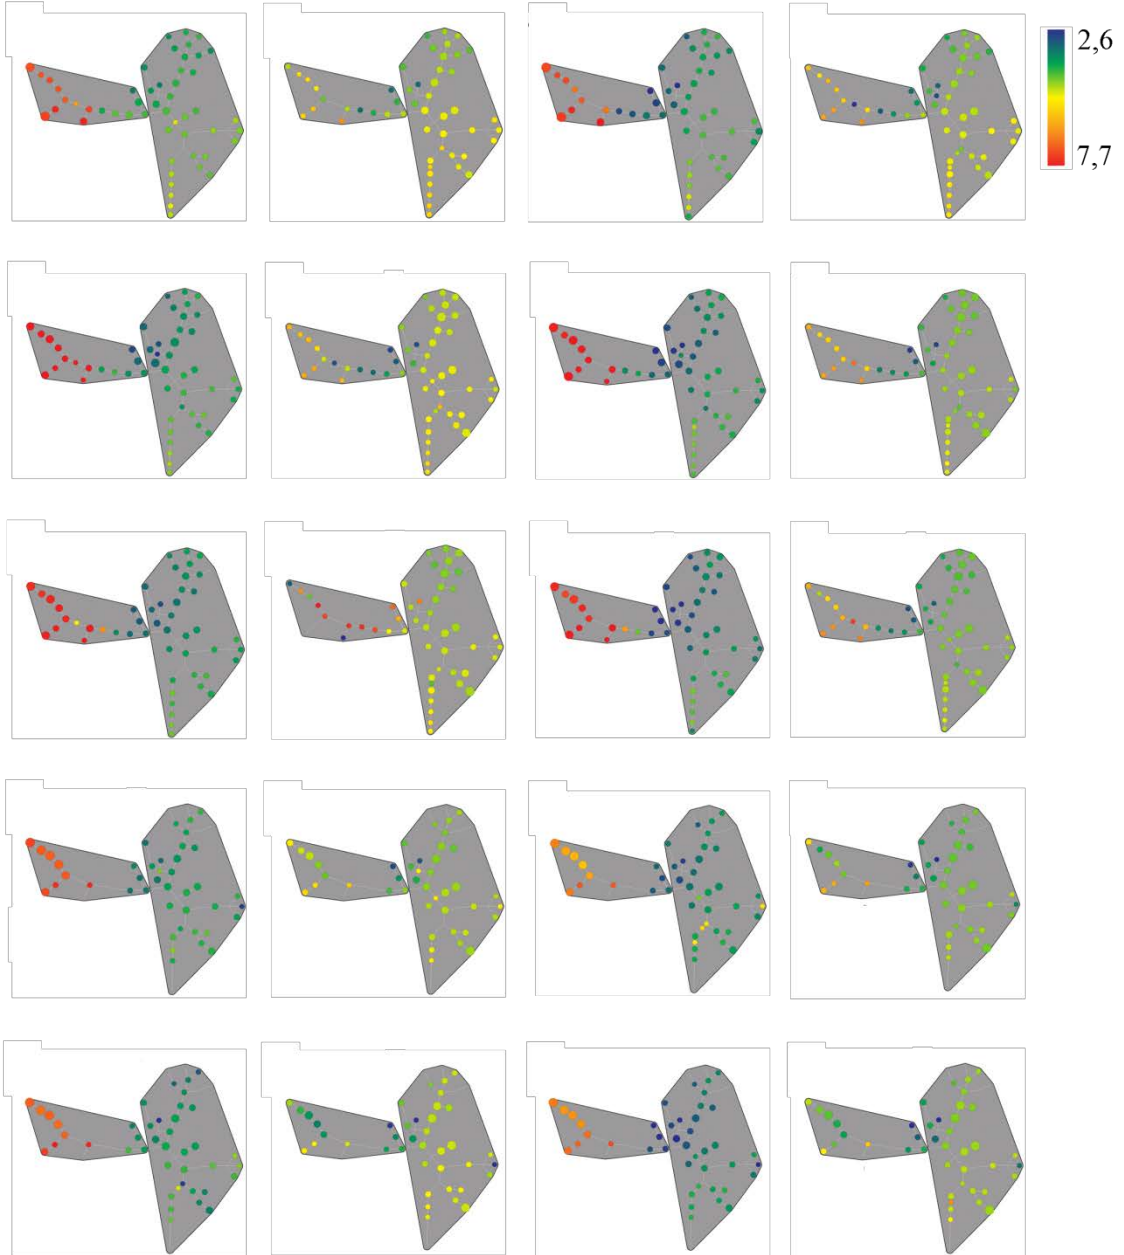

Supplement: f1 [file 7801781.f1.pdf]
